# Supplementary material for: Endogenous Akt Activity Promotes Virus Entry and Predicts Efficacy of Novel Chimeric Orthopoxvirus in Triple-Negative Breast Cancer
Source: PubMed Central journal article supplement — Mol Ther Oncolytics. 2018 Apr 5;9:22–9. doi: 10.1016/j.omto.2018.04.001 (PMC6026447; doi:10.1016/j.omto.2018.04.001), 2018-04-05
Supplement: mmc1.pdf [file mmc1.pdf]

**OMTO, Volume 9**

**Supplemental Information**

**Endogenous Akt Activity Promotes Virus Entry  
and Predicts Efficacy of Novel Chimeric  
Orthopoxvirus in Triple-Negative Breast Cancer**

**Audrey H. Choi, Michael P. O'Leary, Jianming Lu, Sang-In Kim, Yuman Fong, and Nanhai G. Chen**

## Supplementary Data

### Supplemental Figure 1. CF33 infects MDA-MB-468 tumors *in vivo*.

Immunofluorescent detection of polyclonal antibody against vaccinia virus demonstrates viral infection of MDA-MB-468 xenograft tumor tissue harvested one week after intratumoral CF33 injection. (A) Control tumor, 4X, (B) Control tumor, 60X, (C) Tumor treated with  $10^5$  PFU, 4X, (C) Tumor treated with  $10^5$  PFU, 60X. (VV: green; DAPI counterstain: blue).

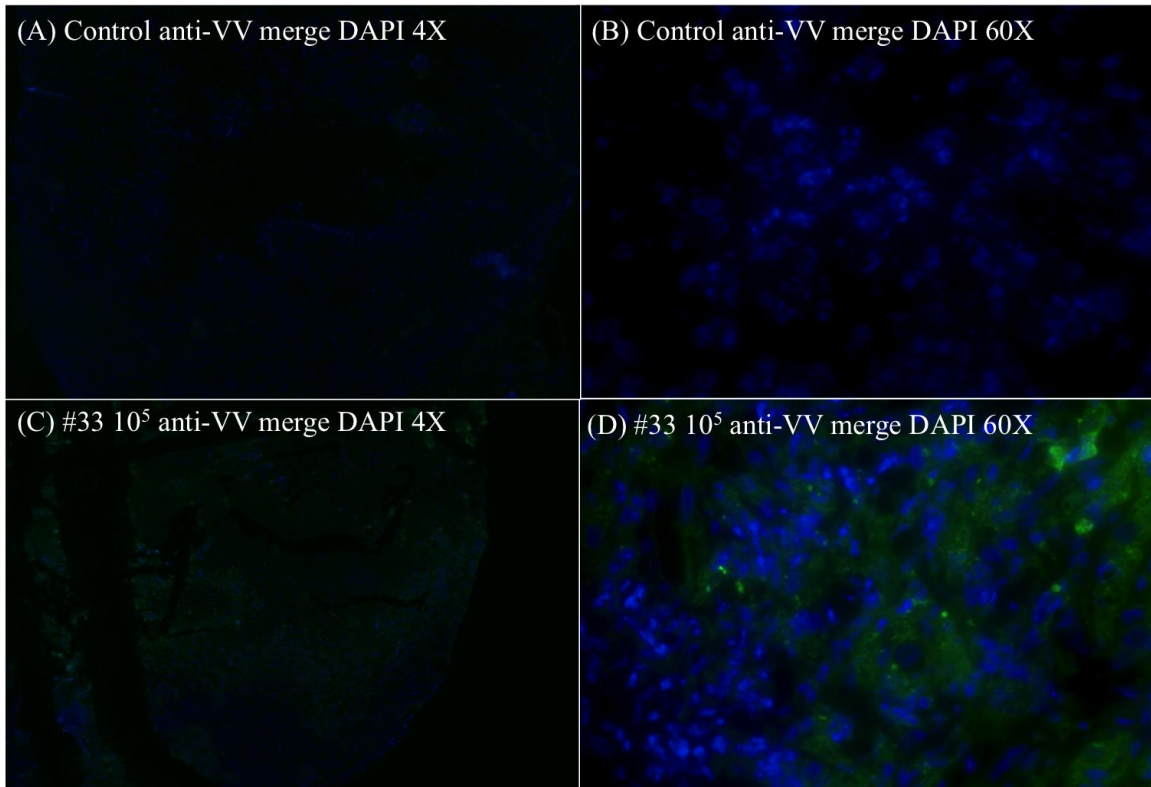

**Supplemental Figure 2. High-throughput screening of CF33 against parental viruses.** All cells were infected at 0.01 MOI and assayed for cell viability at 96 hours post-infection. While none of the viruses were effective against MD-MBA-231 or MD-MBA-468 at this particular screening MOI, CF33 was more effective than any of the parental viruses against BT549 and Hs578T and was thus selected for further study. Data are presented as means  $\pm$  standard deviation of the means.

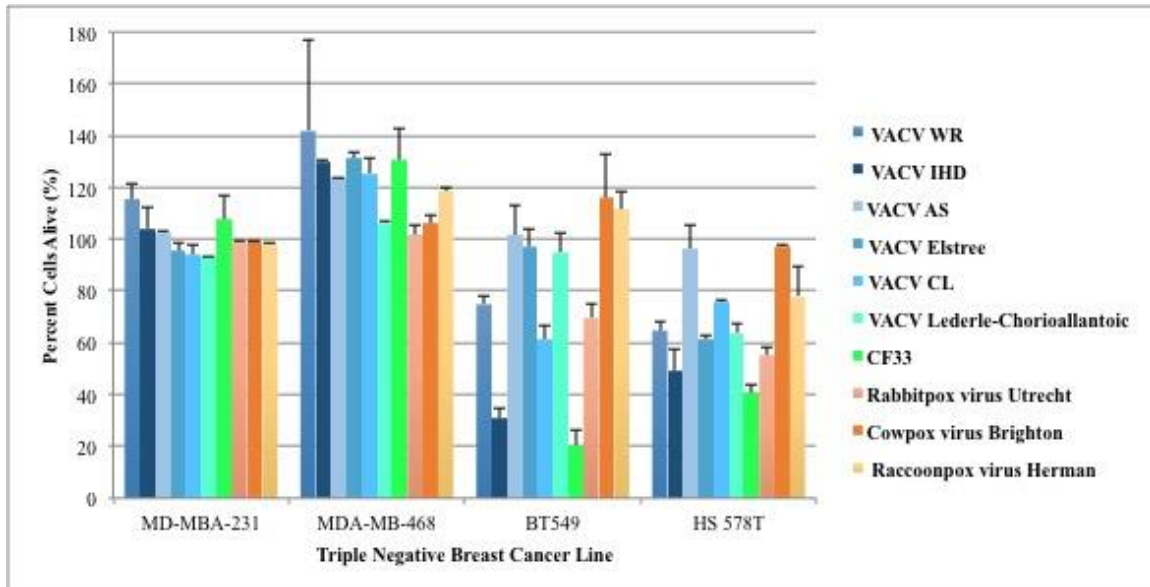

| Virus                        | MD-MBA-231    |      | MDA-MB-468    |       | BT549         |       | HS 578T       |       |
|------------------------------|---------------|------|---------------|-------|---------------|-------|---------------|-------|
|                              | % Cells Alive | SD   | % Cells Alive | SD    | % Cells Alive | SD    | % Cells Alive | SD    |
| VACV WR                      | 115.46        | 5.89 | 141.72        | 35.53 | 74.84         | 3.14  | 64.75         | 3.56  |
| VACV IHD                     | 104.11        | 8.32 | 129.44        | 1.04  | 30.91         | 3.69  | 49.18         | 8.27  |
| VACV AS                      | 102.31        | 0.92 | 123.57        | 0.52  | 101.56        | 11.86 | 95.97         | 9.80  |
| VACV Elstree                 | 95.36         | 2.89 | 131.09        | 2.33  | 97.22         | 6.36  | 61.42         | 1.65  |
| VACV CL                      | 94.14         | 3.70 | 125.40        | 5.71  | 61.40         | 5.50  | 75.73         | 0.76  |
| VACV Lederle-Chorioallantoic | 93.32         | 0.00 | 106.51        | 0.26  | 95.00         | 7.62  | 63.94         | 3.69  |
| CF33                         | 107.46        | 9.36 | 130.35        | 12.19 | 20.52         | 5.81  | 40.72         | 3.44  |
| Rabbitpox virus Utrecht      | 99.04         | 0.69 | 101.74        | 3.37  | 69.56         | 5.11  | 55.21         | 3.05  |
| Cowpox virus Brighton        | 99.04         | 0.46 | 105.96        | 3.11  | 116.11        | 17.04 | 97.32         | 0.25  |
| Raccoonpox virus Herman      | 98.14         | 0.35 | 118.62        | 1.30  | 111.61        | 6.75  | 77.80         | 11.84 |
